# Supplementary material for: Co-hydrothermal carbonization of pretreated sludge and polyethylene terephthalate for the preparation of low-nitrogen clean solid fuels
Source: Royal Society of Chemistry journal article supplement (doi:10.1039/d4ra02165g), 2024-01-01
Supplement: d4ra02165g1.pdf [file d4ra02165g1.pdf]

Table S1 Elemental analysis and aqueous phase product TC analysis results for SS and pretreated SS hydrochars (average value ± standard deviation)

| Sample name | EA results of hydrochars (wt.%) |           |           |           |            | H/C  | N/C  | O/C  | HHV (MJ/kg) | ER (%) | $\eta_N$ (%) | Yield (wt.%) | C in liquid (g/L) |           |            | N in liquid (g/L)            |                              |           |
|-------------|---------------------------------|-----------|-----------|-----------|------------|------|------|------|-------------|--------|--------------|--------------|-------------------|-----------|------------|------------------------------|------------------------------|-----------|
|             | C                               | H         | N         | S         | O          |      |      |      |             |        |              |              | TOC               | TIC       | TC         | NH <sub>4</sub> <sup>+</sup> | NO <sub>3</sub> <sup>-</sup> | DON       |
| SS -150     | 19.30±0.24                      | 3.01±0.04 | 2.68±0.08 | 0.52±0.02 | 20.07±0.20 | 1.87 | 0.12 | 0.78 | 7.26        | 64.90  | 28.72        | 83.74±0.23   | 8.72±0.12         | 1.54±0.02 | 10.26±0.12 | 0.26±0.02                    | 0.23±0.02                    | 0.66±0.06 |
| SS -180     | 17.70±0.22                      | 2.39±0.01 | 2.09±0.02 | 0.32±0.02 | 17.63±0.17 | 1.62 | 0.10 | 0.75 | 6.30        | 52.00  | 44.41        | 77.29±0.13   | 7.84±0.07         | 2.85±0.02 | 10.69±0.14 | 1.36±0.06                    | 0.3±0.02                     | 0.46±0.03 |
| SS -210     | 17.60±0.17                      | 2.41±0.02 | 1.73±0.06 | 0.49±0.01 | 15.81±0.22 | 1.65 | 0.08 | 0.67 | 6.64        | 52.40  | 53.99        | 73.91±0.15   | 7.33±0.08         | 2.96±0.05 | 10.29±0.12 | 1.38±0.07                    | 0.08±0.01                    | 1.14±0.06 |
| SS -240     | 17.37±0.18                      | 2.33±0.06 | 1.60±0.03 | 0.47±0.02 | 14.75±0.24 | 1.61 | 0.08 | 0.64 | 6.63        | 47.14  | 57.45        | 66.66±0.18   | 11.25±0.11        | 1.55±0.03 | 12.80±0.09 | 0.99±0.05                    | 0.14±0.02                    | 0.91±0.04 |
| SS -270     | 15.88±0.17                      | 2.04±0.02 | 1.29±0.01 | 0.34±0.01 | 14.03±0.18 | 1.54 | 0.07 | 0.66 | 5.87        | 44.44  | 65.69        | 70.89±0.18   | 11.98±0.10        | 1.44±0.01 | 13.41±0.15 | 0.62±0.05                    | 0.22±0.02                    | 0.63±0.06 |
| SDSA-150    | 18.08±0.21                      | 2.92±0.03 | 2.05±0.03 | 0.35±0.01 | 18.08±0.26 | 1.94 | 0.10 | 0.75 | 8.11        | 78.24  | 18.33        | 88.64±0.20   | 4.48±0.03         | 2.45±0.03 | 6.93±0.06  | 0.28±0.03                    | 0.15±0.02                    | 0.38±0.02 |
| SDSA-180    | 16.86±0.24                      | 2.10±0.02 | 1.38±0.01 | 0.51±0.02 | 15.45±0.20 | 1.49 | 0.07 | 0.69 | 7.17        | 66.28  | 45.02        | 84.93±0.15   | 7.47±0.07         | 1.68±0.05 | 9.15±0.09  | 0.55±0.04                    | 0.28±0.03                    | 0.36±0.02 |
| SDSA-210    | 16.37±0.12                      | 1.98±0.06 | 1.09±0.06 | 0.48±0.02 | 13.89±0.22 | 1.45 | 0.06 | 0.64 | 6.90        | 59.40  | 56.57        | 79.05±0.17   | 8.33±0.11         | 1.64±0.03 | 9.97±0.11  | 0.67±0.04                    | 0.11±0.02                    | 0.48±0.03 |
| SDSA-240    | 15.89±0.15                      | 1.93±0.02 | 0.96±0.04 | 0.28±0.01 | 12.49±0.12 | 1.46 | 0.05 | 0.59 | 7.03        | 67.21  | 61.75        | 87.80±0.13   | 6.32±0.08         | 1.98±0.02 | 8.30±0.10  | 0.72±0.06                    | 0.02±0.01                    | 0.64±0.05 |
| SDSA-270    | 15.63±0.11                      | 1.79±0.03 | 0.86±0.03 | 0.26±0.01 | 11.80±0.17 | 1.37 | 0.05 | 0.57 | 6.68        | 54.94  | 65.74        | 75.51±0.15   | 5.08±0.03         | 1.68±0.01 | 6.76±0.07  | 1.05±0.06                    | 0.06±0.01                    | 0.36±0.02 |
| UA-150      | 9.86±0.14                       | 1.62±0.02 | 0.90±0.03 | 0.22±0.01 | 12.77±0.15 | 1.97 | 0.08 | 0.97 | 3.51        | 86.77  | 21.74        | 95.01±0.23   | 2.17±0.05         | 1.56±0.01 | 3.73±0.03  | 0.37±0.03                    | 0.32±0.04                    | 0.08±0.01 |
| UA-180      | 9.74±0.12                       | 1.49±0.01 | 0.75±0.04 | 0.27±0.01 | 11.75±0.24 | 1.83 | 0.07 | 0.91 | 3.46        | 80.34  | 34.78        | 89.29±0.20   | 6.44±0.03         | 1.39±0.03 | 7.83±0.07  | 0.52±0.06                    | 0.08±0.01                    | 0.1±0.01  |
| UA-210      | 8.63±0.24                       | 1.21±0.01 | 0.59±0.06 | 0.22±0.01 | 10.43±0.17 | 1.69 | 0.06 | 0.91 | 2.93        | 70.76  | 48.70        | 93.02±0.15   | 6.36±0.09         | 1.42±0.02 | 7.79±0.07  | 0.51±0.04                    | 0.25±0.02                    | 0.22±0.02 |
| UA-240      | 8.93±0.15                       | 1.22±0.06 | 0.56±0.04 | 0.16±0.01 | 8.92±0.16  | 1.64 | 0.05 | 0.75 | 3.27        | 74.80  | 51.30        | 87.90±0.25   | 5.49±0.07         | 1.61±0.02 | 7.10±0.09  | 0.57±0.06                    | 0.05±0.01                    | 0.27±0.02 |
| UA-270      | 7.83±0.14                       | 1.06±0.01 | 0.46±0.01 | 0.15±0.01 | 8.23±0.11  | 1.63 | 0.05 | 0.79 | 2.80        | 66.33  | 60.00        | 91.08±0.22   | 5.33±0.12         | 1.72±0.03 | 7.05±0.12  | 0.89±0.06                    | 0.2±0.03                     | 0.31±0.04 |
| SDSU-150    | 12.73±0.11                      | 2.03±0.04 | 1.17±0.04 | 0.37±0.01 | 12.94±0.24 | 1.91 | 0.08 | 0.76 | 4.99        | 89.86  | 19.86        | 97.19±0.26   | 4.42±0.03         | 1.64±0.01 | 6.06±0.05  | 0.14±0.02                    | 0.23±0.03                    | 0.11±0.02 |
| SDSU-180    | 10.81±0.17                      | 1.54±0.01 | 0.77±0.06 | 0.27±0.01 | 10.99±0.17 | 1.71 | 0.06 | 0.76 | 4.01        | 68.54  | 47.26        | 92.33±0.25   | 5.84±0.05         | 1.42±0.01 | 7.26±0.07  | 0.34±0.03                    | 0.04±0.01                    | 0.49±0.04 |
| SDSU-210    | 12.07±0.24                      | 1.66±0.01 | 0.76±0.01 | 0.25±0.01 | 10.25±0.24 | 1.65 | 0.05 | 0.64 | 4.72        | 78.18  | 47.95        | 89.38±0.23   | 6.30±0.07         | 1.61±0.03 | 7.91±0.05  | 0.38±0.03                    | 0.1±0.02                     | 0.49±0.04 |
| SDSU-240    | 9.75±0.15                       | 1.27±0.01 | 0.62±0.02 | 0.21±0.01 | 9.29±0.16  | 1.57 | 0.05 | 0.71 | 3.56        | 61.71  | 57.53        | 93.57±0.23   | 6.42±0.07         | 1.73±0.03 | 8.15±0.10  | 0.65±0.06                    | 0.15±0.02                    | 0.2±0.03  |
| SDSU-270    | 9.46±0.14                       | 1.18±0.01 | 0.57±0.02 | 0.27±0.01 | 8.71±0.11  | 1.50 | 0.05 | 0.69 | 3.42        | 55.55  | 60.96        | 87.56±0.14   | 5.11±0.05         | 1.93±0.05 | 7.04±0.09  | 0.97±0.06                    | 0.32±0.03                    | 0.12±0.02 |

Table S2 Final analysis of hydrochars (average value ± standard deviation)

| Sample name | Proximate analysis (wt%) |            |           |
|-------------|--------------------------|------------|-----------|
|             | Ash                      | VM         | FC        |
| SS          | 48.84±0.21               | 46.59±0.13 | 4.57±0.02 |
| SS-150      | 50.52±0.13               | 43.65±0.17 | 5.83±0.04 |
| SS-180      | 50.89±0.15               | 42.19±0.23 | 6.92±0.03 |
| SS-210      | 51.53±0.14               | 40.65±0.22 | 7.82±0.06 |
| SS-240      | 55.32±0.17               | 36.95±0.15 | 7.73±0.06 |
| SS-270      | 58.58±0.14               | 32.61±0.22 | 8.81±0.03 |

Table S3 Elemental analysis and yield results for hydrochars (average value ± standard deviation)

| Sample name                                                                                              | EA results of hydrochars (wt.%) |           |           |           |            | Yield (wt.%) | HHV (MJ/Kg) | $\eta_N$ (%) |
|----------------------------------------------------------------------------------------------------------|---------------------------------|-----------|-----------|-----------|------------|--------------|-------------|--------------|
|                                                                                                          | C                               | H         | N         | S         | O          |              |             |              |
| Temperature (°C) (PET loading proportion=20 wt.%, 2 h, water loading amount = 0.6 g/cm <sup>3</sup> )    |                                 |           |           |           |            |              |             |              |
| SP-0.2-180-2-0.6                                                                                         | 22.39±0.32                      | 2.21±0.05 | 0.71±0.03 | 0.26±0.01 | 17.43±0.27 | 82.43±0.38   | 7.86        | 64.64        |
| SP-0.2-210-2-0.6                                                                                         | 17.86±0.22                      | 1.80±0.02 | 0.57±0.01 | 0.17±0.01 | 16.13±0.23 | 75.92±0.36   | 5.97        | 71.61        |
| SP-0.2-240-2-0.6                                                                                         | 19.10±0.37                      | 1.72±0.03 | 0.51±0.01 | 0.15±0.01 | 15.31±0.36 | 72.38±0.34   | 6.41        | 74.60        |
| SP-0.2-270-2-0.6                                                                                         | 18.55±0.22                      | 1.90±0.02 | 0.54±0.02 | 0.37±0.02 | 15.58±0.27 | 71.49±0.41   | 6.44        | 73.11        |
| SP-0.2-300-2-0.6                                                                                         | 17.78±0.23                      | 1.67±0.05 | 0.49±0.01 | 0.19±0.01 | 14.35±0.36 | 69.16±0.21   | 6.05        | 75.60        |
| Reaction time (h) (PET loading proportion=20 wt.%, 240°C, water loading amount = 0.6 g/cm <sup>3</sup> ) |                                 |           |           |           |            |              |             |              |
| SP-0.2-240-0.5-0.6                                                                                       | 17.71±0.22                      | 1.71±0.03 | 0.53±0.02 | 0.15±0.01 | 15.73±0.22 | 73.74±0.38   | 5.87        | 73.61        |
| SP-0.2-240-1-0.6                                                                                         | 17.90±0.23                      | 1.71±0.05 | 0.55±0.01 | 0.17±0.01 | 15.50±0.36 | 75.44±0.18   | 5.97        | 72.61        |
| SP-0.2-240-2-0.6                                                                                         | 19.10±0.37                      | 1.72±0.03 | 0.51±0.01 | 0.15±0.01 | 15.31±0.36 | 72.38±0.34   | 6.41        | 74.60        |
| SP-0.2-240-3-0.6                                                                                         | 18.23±0.22                      | 1.70±0.03 | 0.62±0.02 | 0.30±0.02 | 14.58±0.22 | 71.89±0.23   | 6.19        | 69.12        |
| SP-0.2-240-4-0.6                                                                                         | 19.06±0.36                      | 1.85±0.05 | 0.59±0.01 | 0.33±0.01 | 15.04±0.23 | 70.20±0.36   | 6.61        | 70.62        |
| Water loading amount (g/cm <sup>3</sup> ) (PET loading proportion =20 wt.%, 240°C, 2h)                   |                                 |           |           |           |            |              |             |              |
| SP-0.2-240-2-0.5                                                                                         | 19.47±0.36                      | 1.79±0.05 | 0.66±0.01 | 0.25±0.01 | 16.11±0.23 | 70.87±0.43   | 6.50        | 67.13        |
| SP-0.2-240-2-0.6                                                                                         | 19.10±0.37                      | 1.72±0.03 | 0.51±0.01 | 0.15±0.01 | 15.31±0.36 | 72.38±0.34   | 6.41        | 74.60        |
| SP-0.2-240-2-0.7                                                                                         | 18.43±0.27                      | 1.76±0.06 | 0.66±0.01 | 0.24±0.02 | 15.21±0.22 | 69.30±0.29   | 6.25        | 67.13        |
| SP-0.2-240-2-0.8                                                                                         | 18.38±0.33                      | 1.84±0.03 | 0.57±0.01 | 0.17±0.01 | 15.89±0.27 | 67.30±0.38   | 6.24        | 71.61        |

Table S4 Analytical results of TC, TOC, TIC and PH in liquid phase (average value  $\pm$  standard deviation)

| Sample name                                                                                              | N/C  | H/C  | O/C  | C in liquid (g/L) |                  |                  | ER (%) | PH in liquid    |
|----------------------------------------------------------------------------------------------------------|------|------|------|-------------------|------------------|------------------|--------|-----------------|
|                                                                                                          |      |      |      | TOC               | TIC              | TC               |        |                 |
| SS-240-2-0.6                                                                                             | 0.08 | 1.55 | 0.57 | 11.35 $\pm$ 0.22  | 1.66 $\pm$ 0.02  | 13.01 $\pm$ 0.12 | 45.86  | 5.79 $\pm$ 0.13 |
| PET loading proportion (wt.%) (240°C, 2 h, water loading amount = 0.6 g/cm <sup>3</sup> )                |      |      |      |                   |                  |                  |        |                 |
| SP-0-240-2-0.6                                                                                           | 0.05 | 1.56 | 0.60 | 6.43 $\pm$ 0.09   | 2.36 $\pm$ 0.07  | 8.79 $\pm$ 0.21  | 35.57  | 6.33 $\pm$ 0.12 |
| SP-0.2-240-2-0.6                                                                                         | 0.02 | 1.08 | 0.53 | 3.54 $\pm$ 0.11   | 11.84 $\pm$ 0.28 | 15.38 $\pm$ 0.26 | 48.42  | 5.06 $\pm$ 0.07 |
| SP-0.5-240-2-0.6                                                                                         | 0.01 | 0.90 | 0.38 | 9.56 $\pm$ 0.22   | 12.47 $\pm$ 0.18 | 22.03 $\pm$ 0.33 | 95.55  | 4.98 $\pm$ 0.05 |
| SP-0.8-240-2-0.6                                                                                         | 0.00 | 0.80 | 0.37 | 10.27 $\pm$ 0.18  | 12.28 $\pm$ 0.17 | 22.55 $\pm$ 0.20 | 127.97 | 4.62 $\pm$ 0.02 |
| SP-1-240-2-0.6                                                                                           | 0.00 | 0.76 | 0.39 | 11.36 $\pm$ 0.24  | 11.76 $\pm$ 0.14 | 23.12 $\pm$ 0.28 | 166.54 | 3.52 $\pm$ 0.04 |
| Temperature (°C) (PET loading proportion=20 wt.%, 2 h, water loading amount = 0.6 g/cm <sup>3</sup> )    |      |      |      |                   |                  |                  |        |                 |
| SP-0.2-180-2-0.6                                                                                         | 0.03 | 1.18 | 0.52 | 2.62 $\pm$ 0.09   | 10.58 $\pm$ 0.18 | 13.20 $\pm$ 0.14 | 67.55  | 5.54 $\pm$ 0.04 |
| SP-0.2-210-2-0.6                                                                                         | 0.03 | 1.21 | 0.60 | 3.41 $\pm$ 0.05   | 12.12 $\pm$ 0.11 | 15.53 $\pm$ 0.17 | 47.30  | 5.36 $\pm$ 0.04 |
| SP-0.2-240-2-0.6                                                                                         | 0.02 | 1.08 | 0.53 | 3.54 $\pm$ 0.11   | 11.84 $\pm$ 0.28 | 15.38 $\pm$ 0.26 | 48.42  | 5.06 $\pm$ 0.07 |
| SP-0.2-270-2-0.6                                                                                         | 0.02 | 1.23 | 0.56 | 4.34 $\pm$ 0.03   | 12.31 $\pm$ 0.12 | 16.65 $\pm$ 0.34 | 47.98  | 5.22 $\pm$ 0.07 |
| SP-0.2-300-2-0.6                                                                                         | 0.02 | 1.13 | 0.54 | 2.42 $\pm$ 0.09   | 12.41 $\pm$ 0.14 | 14.84 $\pm$ 0.32 | 43.65  | 4.89 $\pm$ 0.02 |
| Reaction time (h) (PET loading proportion=20 wt.%, 240°C, water loading amount = 0.6 g/cm <sup>3</sup> ) |      |      |      |                   |                  |                  |        |                 |
| SP-0.2-240-0.5-0.6                                                                                       | 0.03 | 1.16 | 0.59 | 2.15 $\pm$ 0.03   | 12.13 $\pm$ 0.14 | 14.28 $\pm$ 0.17 | 45.14  | 5.16 $\pm$ 0.03 |
| SP-0.2-240-1-0.6                                                                                         | 0.03 | 1.15 | 0.58 | 1.91 $\pm$ 0.05   | 12.00 $\pm$ 0.11 | 13.91 $\pm$ 0.14 | 46.96  | 5.12 $\pm$ 0.04 |
| SP-0.2-240-2-0.6                                                                                         | 0.02 | 1.08 | 0.53 | 3.54 $\pm$ 0.11   | 11.84 $\pm$ 0.28 | 15.38 $\pm$ 0.26 | 48.42  | 5.06 $\pm$ 0.07 |
| SP-0.2-240-3-0.6                                                                                         | 0.03 | 1.12 | 0.53 | 4.12 $\pm$ 0.09   | 12.17 $\pm$ 0.18 | 16.29 $\pm$ 0.32 | 46.44  | 5.19 $\pm$ 0.03 |
| SP-0.2-240-4-0.6                                                                                         | 0.03 | 1.16 | 0.53 | 2.53 $\pm$ 0.05   | 12.04 $\pm$ 0.12 | 14.57 $\pm$ 0.17 | 48.41  | 5.20 $\pm$ 0.04 |
| Water loading amount (g/cm <sup>3</sup> ) (PET loading proportion =20 wt.%, 240°C, 2h)                   |      |      |      |                   |                  |                  |        |                 |
| SP-0.2-240-2-0.5                                                                                         | 0.03 | 1.10 | 0.55 | 3.02 $\pm$ 0.03   | 12.04 $\pm$ 0.14 | 15.06 $\pm$ 0.17 | 48.02  | 5.01 $\pm$ 0.03 |
| SP-0.2-240-2-0.6                                                                                         | 0.02 | 1.08 | 0.53 | 3.54 $\pm$ 0.11   | 11.84 $\pm$ 0.28 | 15.38 $\pm$ 0.26 | 48.42  | 5.06 $\pm$ 0.07 |
| SP-0.2-240-2-0.7                                                                                         | 0.03 | 1.15 | 0.55 | 3.02 $\pm$ 0.04   | 12.01 $\pm$ 0.18 | 15.02 $\pm$ 0.34 | 45.15  | 5.21 $\pm$ 0.04 |
| SP-0.2-240-2-0.8                                                                                         | 0.03 | 1.20 | 0.58 | 3.18 $\pm$ 0.05   | 11.89 $\pm$ 0.11 | 15.07 $\pm$ 0.26 | 43.80  | 5.17 $\pm$ 0.04 |

Table S5 Thermal behavior and combustion characteristics parameters of hydrochars

| Sample name                                                                                              | Characteristic Temperature/°C |        |        | $a_i$  | $a_f$ | $(dw/dt)_{max}$ (%/min) | $(dw/dt)_{mean}$ (%/min) | $T_{mass\ residue}$ | $M_{mass\ residue}$ | $S$ ( $10^{-8}/(\text{min}^2 \times \text{C}^{-3})$ ) |          |
|----------------------------------------------------------------------------------------------------------|-------------------------------|--------|--------|--------|-------|-------------------------|--------------------------|---------------------|---------------------|-------------------------------------------------------|----------|
|                                                                                                          | $T_i$                         | $T_f$  | $T_m$  |        |       |                         |                          |                     |                     |                                                       |          |
| PET loading proportion (wt.%) (240°C, 2 h, water loading amount = 0.6 g/cm <sup>3</sup> )                |                               |        |        |        |       |                         |                          |                     |                     |                                                       |          |
| 0                                                                                                        | SP-0-240-2-0.6                | 246.33 | 490.77 | 402.48 | 95.69 | 79.08                   | -1.95                    | 1.36                | 75.30               | 75.30                                                 | -8.89    |
| 20                                                                                                       | SP-0.2-240-2-0.6              | 300.78 | 437.94 | 367.00 | 91.28 | 74.41                   | -5.95                    | 2.46                | 52.06               | 65.07                                                 | -36.95   |
| 50                                                                                                       | SP-0.5-240-2-0.6              | 316.22 | 377.04 | 346.48 | 87.97 | 55.10                   | -18.02                   | 10.81               | 18.42               | 36.84                                                 | -516.62  |
| 80                                                                                                       | SP-0.8-240-2-0.6              | 334.99 | 389.31 | 363.58 | 84.17 | 31.26                   | -28.45                   | 19.48               | 2.19                | 10.95                                                 | -1268.59 |
| 100                                                                                                      | SP-1-240-2-0.6                | 343.58 | 385.74 | 371.54 | 77.36 | 8.76                    | -39.63                   | 32.54               | 0.00                | 0.00                                                  | -2832.55 |
| Temperature (°C) (PET loading proportion=20 wt.%, 2 h, water loading amount = 0.6 g/cm <sup>3</sup> )    |                               |        |        |        |       |                         |                          |                     |                     |                                                       |          |
| 180                                                                                                      | SP-0.2-180-2-0.6              | 340.80 | 458.46 | 406.58 | 88.59 | 65.33                   | -10.12                   | 3.95                | 52.06               | 61.07                                                 | -75.16   |
| 210                                                                                                      | SP-0.2-210-2-0.6              | 333.19 | 417.68 | 377.73 | 87.92 | 72.44                   | -7.19                    | 3.66                | 52.06               | 64.57                                                 | -56.80   |
| 240                                                                                                      | SP-0.2-240-2-0.6              | 300.78 | 437.94 | 367.00 | 91.28 | 74.41                   | -5.95                    | 2.46                | 52.06               | 65.07                                                 | -36.95   |
| 270                                                                                                      | SP-0.2-270-2-0.6              | 317.92 | 420.50 | 369.66 | 87.86 | 75.49                   | -5.12                    | 2.41                | 52.06               | 65.19                                                 | -29.05   |
| 300                                                                                                      | SP-0.2-300-2-0.6              | 268.89 | 404.88 | 312.55 | 94.91 | 77.85                   | -4.41                    | 2.51                | 52.06               | 67.51                                                 | -37.80   |
| Reaction time (h) (PET loading proportion=20 wt.%, 240°C, water loading amount = 0.6 g/cm <sup>3</sup> ) |                               |        |        |        |       |                         |                          |                     |                     |                                                       |          |
| 0.5                                                                                                      | SP-0.2-240-0.5-0.6            | 328.18 | 417.20 | 375.57 | 87.53 | 73.94                   | -5.77                    | 3.05                | 52.06               | 65.46                                                 | -39.18   |
| 1                                                                                                        | SP-0.2-240-1-0.6              | 296.79 | 448.13 | 376.87 | 90.56 | 72.79                   | -4.93                    | 2.35                | 52.06               | 65.20                                                 | -29.30   |
| 2                                                                                                        | SP-0.2-240-2-0.6              | 300.78 | 437.94 | 367.00 | 91.28 | 74.41                   | -5.95                    | 2.46                | 52.06               | 65.07                                                 | -36.95   |
| 3                                                                                                        | SP-0.2-240-3-0.6              | 325.98 | 415.39 | 370.83 | 88.51 | 76.63                   | -5.58                    | 2.66                | 52.06               | 67.13                                                 | -33.56   |
| 4                                                                                                        | SP-0.2-240-4-0.6              | 317.93 | 429.65 | 373.70 | 89.27 | 75.14                   | -6.01                    | 2.53                | 52.06               | 65.90                                                 | -35.02   |
| Water loading amount (g/cm <sup>3</sup> ) (PET loading proportion =20 wt.%, 240°C, 2h)                   |                               |        |        |        |       |                         |                          |                     |                     |                                                       |          |
| 0.5                                                                                                      | SP-0.2-240-2-0.5              | 305.39 | 432.14 | 372.08 | 90.90 | 73.26                   | -6.37                    | 2.78                | 52.06               | 64.88                                                 | -43.99   |
| 0.6                                                                                                      | SP-0.2-240-2-0.6              | 300.78 | 437.94 | 367.00 | 91.28 | 74.41                   | -5.95                    | 2.46                | 52.06               | 65.07                                                 | -36.95   |
| 0.7                                                                                                      | SP-0.2-240-2-0.7              | 337.22 | 403.16 | 370.49 | 87.21 | 76.92                   | -5.43                    | 3.12                | 52.06               | 66.06                                                 | -36.94   |
| 0.8                                                                                                      | SP-0.2-240-2-0.8              | 308.03 | 443.89 | 378.73 | 90.15 | 72.74                   | -6.71                    | 2.56                | 52.06               | 65.30                                                 | -40.84   |
